# Supplementary material
Source: publisher figshare collection journal article supplement (https://gsajournals.figshare.com/ndownloader/files/22441133)
Supplement: Supplementary file 1 [file 22441133]

## Sheet: Exclusively expressed in hyphae
gene name	protein name
MAN_00440	2OG-Fe(II) oxygenase superfamily protein, partial
MAN_07863	Allergen V5/Tpx-1-related protein, partial
MAN_06055	amino acid permease 2, partial
MAN_08864	Ankyrin repeat-containing domain protein, partial
MAN_04624	Ankyrin repeat-containing domain protein, partial
MAN_09472	ATP synthase beta chain precursor, partial
MAN_00907	benzoate 4-monooxygenase cytochrome P450, partial
MAN_09465	Beta-ketoacyl synthase, partial
MAN_06105	chitinase, partial
MAN_07621	choline binding protein D, partial
MAN_02928	choline dehydrogenase, partial
MAN_06851	conidiation-specific protein 10, partial
MAN_00217	conidiospore surface protein, partial
MAN_07738	cytochrome P450 3A31, partial
MAN_03562	cytochrome P450 4F8, partial
MAN_06358	extracellular dihydrogeodin oxidase/laccase, partial
MAN_07745	fatty acid synthase subunit beta dehydratase, partial
MAN_09721	Floculation protein FLO1, partial
MAN_09183	Glucose-methanol-choline oxidoreductase, partial
MAN_05753	glutathione S-transferase, partial
MAN_07916	glycosyl transferase, partial
MAN_06097	G-protein coupled receptor, partial
MAN_06852	HHE domain containing protein, partial
MAN_00154	hypothetical protein MAN_00154, partial
MAN_00414	hypothetical protein MAN_00414, partial
MAN_00833	hypothetical protein MAN_00833, partial
MAN_00896	hypothetical protein MAN_00896, partial
MAN_01933	hypothetical protein MAN_01933, partial
MAN_01962	hypothetical protein MAN_01962, partial
MAN_04613	hypothetical protein MAN_04613, partial
MAN_05237	hypothetical protein MAN_05237, partial
MAN_05239	hypothetical protein MAN_05239, partial
MAN_05270	hypothetical protein MAN_05270, partial
MAN_05515	hypothetical protein MAN_05515, partial
MAN_05759	hypothetical protein MAN_05759, partial
MAN_06025	hypothetical protein MAN_06025, partial
MAN_06033	hypothetical protein MAN_06033, partial
MAN_06770	hypothetical protein MAN_06770, partial
MAN_07015	hypothetical protein MAN_07015, partial
MAN_07148	hypothetical protein MAN_07148, partial
MAN_07166	hypothetical protein MAN_07166, partial
MAN_07256	hypothetical protein MAN_07256, partial
MAN_07598	hypothetical protein MAN_07598, partial
MAN_07853	hypothetical protein MAN_07853, partial
MAN_07875	hypothetical protein MAN_07875, partial
MAN_09130	hypothetical protein MAN_09130, partial
MAN_09675	hypothetical protein MAN_09675, partial
MAN_09438	Inositol monophosphatase, partial
MAN_09226	Intradiol ring-cleavage dioxygenase, core, partial
MAN_07732	lipase 3 precursor, partial
MAN_10474	Major facilitator superfamily domain, general substrate transporter, partial
MAN_10832	Major facilitator superfamily domain, general substrate transporter, partial
MAN_00283	Major facilitator superfamily domain, general substrate transporter, partial
MAN_02412	Major facilitator superfamily domain, general substrate transporter, partial
MAN_05698	methyltransferase domain-containing protein, partial
MAN_05750	methyltransferase, partial
MAN_09673	mucoidy inhibitor-like protein, partial
MAN_08919	NACHT and Ankyrin domain protein, partial
MAN_07141	nacht nucleoside triphosphatase, partial
MAN_09281	NAD(P)(+)-binding proteins & short chain dehydrogenase, partial
MAN_01603	nitroreductase family protein, partial
MAN_05757	non ribosomal peptide synthase, partial
MAN_08857	non-ribosomal peptide synthetase, partial
MAN_00207	Nucleoside phosphorylase domain protein, partial
MAN_07915	O-methyl transferase B, partial
MAN_00098	Peptidase cysteine/serine, trypsin-like protein, partial
MAN_05751	Peptidase M19, renal dipeptidase, partial
MAN_01922	Peptidase S28, partial
MAN_09693	Peptidase S28, partial
MAN_06654	Peptidase S8, partial
MAN_05329	phosphotransferase family protein, partial
MAN_06329	Pregnancy-associated plasma protein-A, partial
MAN_09223	proline rich protein 5MeD, partial
MAN_07734	protein kinase-like protein, partial
MAN_03765	Pyruvate/Phosphoenolpyruvate kinase, partial
MAN_06835	subtilisin-like protease PR1K, partial
MAN_03821	succinate-semialdehyde dehydrogenase NADP+, partial
MAN_04947	Taurine catabolism dioxygenase TauD/TfdA, partial
MAN_01935	transferase, partial
MAN_00882	Transmembrane protein SKG6, partial
MAN_01639	tripeptidyl peptidase A, partial
MAN_01640	tripeptidyl peptidase A, partial
MAN_02755	Trypsin- protease, partial
MAN_10272	Trypsin- protease, partial
MAN_07684	trypsin-like protease, partial
MAN_06560	Tryptophan halogenase, partial
MAN_00908	Tryptophan halogenase, partial
MAN_07807	WD40/YVTN repeat-like-containing domain protein, partial
MAN_04571	Major facilitator superfamily domain, general substrate transporter, partial
MAN_00018	Amidase signature domain protein, partial
MAN_06693	hypothetical protein MAN_06693, partial
MAN_09471	Alcohol dehydrogenase superfamily, zinc-type, partial
MAN_09443	Het-eN, partial
MAN_00274	hypothetical protein MAN_00274, partial
MAN_02732	ankyrin repeat-containing protein, partial
MAN_10457	NACHT and Ankyrin domain protein, partial
MAN_06026	hypothetical protein MAN_06026, partial

## Sheet: Exclusively expressed in blasto
gene name	protein name
MAN_06149	Alcohol dehydrogenase superfamily, zinc-type, partial
MAN_00742	allantoate permease, partial
MAN_02739	alpha/beta hydrolase, partial
MAN_01650	alpha/beta hydrolase, partial
MAN_10283	alpha-galactosidase, partial
MAN_10031	ankyrin repeat domain protein 17 isoform a, partial
MAN_00054	CAP domain protein, partial
MAN_09808	chitooligosaccharide oxidase, partial
MAN_06331	cyclohexanone monooxygenase, partial
MAN_02742	cytochrome P450, partial
MAN_01655	Cytochrome P450, partial
MAN_01649	eEF-1B gamma subunit-like protein, partial
MAN_05762	Esterase/lipase, partial
MAN_00291	hypothetical protein MAN_00291, partial
MAN_01768	hypothetical protein MAN_01768, partial
MAN_02936	hypothetical protein MAN_02936, partial
MAN_04667	hypothetical protein MAN_04667, partial
MAN_05742	hypothetical protein MAN_05742, partial
MAN_06161	hypothetical protein MAN_06161, partial
MAN_06617	hypothetical protein MAN_06617, partial
MAN_09073	hypothetical protein MAN_09073, partial
MAN_09148	hypothetical protein MAN_09148, partial
MAN_09408	hypothetical protein MAN_09408, partial
MAN_10529	hypothetical protein MAN_10529, partial
MAN_10477	laccase, partial
MAN_09757	Major facilitator superfamily domain, general substrate transporter, partial
MAN_06201	Monooxygenase, FAD-binding protein, partial
MAN_01644	NAD(P)-binding domain protein, partial
MAN_04170	NmrA family protein, partial
MAN_00019	Outer membrane protein, beta-barrel, partial
MAN_06146	oxidoreductase, FAD-binding protein, partial
MAN_04672	oxidoreductase, short chain dehydrogenase/reductase family, partial
MAN_04558	oxidosqualene:lanosterol cyclase, partial
MAN_04597	P450 monooxygenase, partial
MAN_04588	P450 monooxygenase, partial
MAN_04589	P450 monooxygenase, partial
MAN_04590	P450 monooxygenase, partial
MAN_06813	Peptidase S8/S53, subtilisin/kexin/sedolisin, partial
MAN_01619	polyketide synthase, partial
MAN_09372	polyketide synthetase PksP, partial
MAN_04171	porphyromonas-type peptidyl-arginine deiminase superfamily, partial
MAN_06029	protein phosphatase regulatory subunit Gac1, partial
MAN_02681	Ribonuclease III, partial
MAN_10264	small secreted protein, partial
MAN_01654	succinate semialdehyde dehydrogenase, partial
MAN_06164	peptide synthetase, partial
MAN_08129	phospholipase D, partial
MAN_01861	phospholipase D, partial
